# Supplementary material for: Similarities and differences among half-marathon runners according to their performance level
Source: PLoS One. 2018 Jan 24;13(1):e0191688. doi: 10.1371/journal.pone.0191688 (PMC5783408; doi:10.1371/journal.pone.0191688)
Supplement: S1 Dataset — (XLS) [file pone.0191688.s001.xls]

## Sheet: Data
SUBJECTS	GROUP	PERFORMANCE	AGE	FOOT STRIKE PATTERN	EXPERIENCE	VOLUME	MASS	BMI	SUM SKINFOLDS	HEIGHT	LEG-LENGTH	LOWER LEG LENGTH	SHANK CIRCUN	ANKLE CIRCUN	THIGH CIRCUN	PEAK SPEED	VO2max	VO2max (0.75)	RCT SPEED	RCT -% VO2max	VT SPEED	VT -%VO2max	RE	RE (0.75)	RER	PEAK CT	PEAK SR	PEAK SL	RCT CT	RCT SR	RCT SL	VT CT	VT SR	VT SL	CT-11	SR-11	SL-11	CT-13	SR-13	SL-13	CT-15	SR-15	SL-15
1	1	3999	21.3	2	9	100	62.3	18.8081	36.4	182	94	45.3	36.4	21.5	46.4	23.1	68.2183	191.656	19	86.1176	12.9	60.4706	168.218	472.601	0.82	0.164	192.3	1.993	0.187	174.9	1.811	0.25	159.18	1.256	0.258	166.68	1.1	0.238	171.42	1.264	0.217	175.44	1.425
2	1	4093	27.9	2	17	100	60.8	20.41	27.8	172.6	86.5	42	36.1	21.2	46.5	23	68.5855	191.517	19	88.4892	13	61.6307	215.132	600.732	0.85	0.164	192.9	1.987	0.183	181.26	1.747	0.23	167.16	1.296	0.247	161.7	1.134	0.226	165.72	1.307	0.21	170.46	1.467
3	1	3904	22.4	2	9	130	65.4	20.6878	37.6	177.8	88.5	44	34.7	20.4	49.6	23	69.419	197.412	18.2	81.9383	11.9	49.3392	187.768	533.969	0.85	0.174	191.7	1.913	0.196	178.56	1.68	0.254	162.6	1.128	0.261	164.4	1.115	0.233	162.6	1.333	0.216	174.9	1.429
4	1	4093	38.7	2	20	80	74.4	22.963	44.6	180	91.5	44	38.1	23	52.3	21.1	69.4892	204.085	16.8	85.2998	11.1	57.2534	229.032	672.65	0.78	0.188	183.48	1.908	0.231	173.4	1.538	0.269	167.58	1.094	0.252	168.54	1.088	0.236	174.9	1.239	0.225	177	1.412
5	1	4000	29.5	1	23	160	75.8	23.9237	53.7	178	89	43.1	37.9	23.1	54.1	21.8	74.6702	220.325	19.4	83.5689	14.6	59.894	184.169	543.418	0.82	0.182	196.74	1.864	0.205	184.62	1.715	0.25	177.54	1.314	0.289	172.44	1.063	0.261	174.42	1.242	0.241	184.02	1.359
6	1	4122	39.4	1	22	90	64	22.8386	52.2	167.4	87	42.2	34.5	20.4	48.2	21	62.1875	175.893	17	82.9146	12.1	61.0553	197.596	558.886	0.84	0.194	192.9	1.814	0.228	176.46	1.511	0.267	168.06	1.19	0.282	165.72	1.106	0.256	169.02	1.282	0.232	173.94	1.437
7	1	4140	31.9	2	16	100	65.8	21.3635	36.9	175.5	87.8	44.5	35.8	20.8	59.9	21.3	65.3495	186.123	17.5	86.7442	12	64.6512	213.982	609.444	0.83	0.18	185.76	1.884	0.208	178.02	1.592	0.248	166.68	1.2	0.26	165.3	1.109	0.237	170.46	1.271	0.222	173.94	1.437
8	1	4171	24.8	2	8	100	65.4	20.4113	28.6	179	89	45	36.5	21.4	49.7	22.2	66.9725	190.454	18.6	95.2055	12.2	61.8721	203.246	577.985	0.76	0.162	193.56	1.894	0.183	180.72	1.66	0.227	166.68	1.2	0.237	164.4	1.115	0.219	166.68	1.3	0.203	171.42	1.458
9	1	3760	32.5	2	22	150	66.3	21.7732	31	174.5	87.4	42.3	37.4	21	48.3	21.5	72.2474	206.158	19.3	87.6827	14.7	62.4217	177.979	507.864	0.72	0.171	197.34	1.774	0.182	189.9	1.668	0.227	174.42	1.338	0.267	168.06	1.091	0.234	172.92	1.253	0.215	177	1.412
10	1	3813	33.9	2	20	170	59.4	20.5536	28.6	170	86.3	42.6	36.5	20.9	47.6	22.9	79.9663	222	20.8	89.8947	13.6	58.7368	202.694	562.714	0.72	0.229	183.48	1.678	0.158	198.66	1.678	0.206	167.58	1.293	0.223	158.76	1.155	0.205	166.68	1.3	0.189	174.42	1.433
11	1	4097	27.8	1	16	125	71.4	21.1813	34.3	183.6	95.1	46.4	38	22.1	54.2	22	63.8655	185.648	18.7	98.2456	11.1	51.0965	177.763	516.733	0.75	0.208	187.5	1.778	0.222	181.8	1.65	0.279	164.82	1.112	0.261	160.44	1.143	0.248	167.16	1.296	0.24	170.94	1.463
12	2	4749	31.6	1	4	50	74.1	22.5934	44.6	181.1	91.8	44.2	36.9	21	52.8	19.2	59.6491	175.008	16	93.6652	11.5	65.8371	209.447	614.51	0.95	0.209	180.18	1.758	0.231	169.98	1.569	0.286	160.44	1.143	0.282	154.62	1.186	0.26	160.02	1.354	0.242	163.92	1.525
13	2	4766	43.7	2	10	80	70.1	21.6358	59.1	180	92.7	45.9	36.7	21.1	51	20	50.9272	147.36	14.9	86.2745	9.8	51.5406	178.965	517.842	0.83	0.197	190.5	1.662	0.235	178.02	1.311	0.32	167.16	0.897	0.273	168.54	1.088	0.243	173.4	1.25	0.227	179.64	1.392
14	2	4221	26.4	2	11	95	68.7	20.9701	38.6	181	92.3	46.5	39	24.6	50.9	21.9	64.4833	185.646	17.7	87.3589	12.9	73.8149	212.518	611.836	0.86	0.172	186.9	1.962	0.196	168.54	1.681	0.236	158.76	1.26	0.251	160.02	1.146	0.23	159.18	1.361	0.213	165.72	1.509
15	2	4403	28.8	1	11	80	65.7	21.331	42.2	175.5	85	43.2	35.4	22.3	49	21.1	69.4064	197.602	17.9	92.5439	11.3	57.8947	203.021	578.006	0.82	0.218	180.72	1.568	0.218	180.72	1.568	0.278	169.5	1.082	0.269	166.68	1.1	0.252	171.42	1.264	0.229	177.54	1.408
16	2	4320	32.4	2	9	85	71.7	21.6222	33.8	182.1	92.6	47	36.4	20.7	48.7	21.8	66.1088	192.371	17.2	84.1772	12.4	59.2827	224.654	653.723	0.81	0.172	186.9	1.937	0.214	173.94	1.629	0.269	164.4	1.217	0.269	163.5	1.121	0.248	167.58	1.293	0.225	168.54	1.483
17	2	4212	21.8	1	8	80	64.8	19.7796	34.8	181	92	45.5	32.9	21	47.5	21	63.1173	179.078	18.1	92.4205	14.4	71.8826	210.114	596.141	0.72	0.188	196.74	1.779	0.213	187.5	1.6	0.253	177.54	1.314	0.293	172.44	1.063	0.267	173.94	1.246	0.242	174.42	1.43
18	2	4449	22.9	1	14	100	66.1	20.0875	41.2	181.4	92.1	45.2	35.1	21.8	51.4	19.5	60.3631	172.116	15.8	84.4612	12.5	62.1554	202.49	577.37	0.85	0.196	195.42	1.706	0.231	174.42	1.433	0.264	165.3	1.21	0.273	160.02	1.146	0.251	164.82	1.315	0.232	171.42	1.458
19	2	4279	35.6	2	11	85	55.6	19.171	37.8	170.3	86.2	43.3	34.4	20.6	46.9	21.2	72.8417	198.906	18.7	88.642	12.4	55.3086	203.376	555.352	0.87	0.18	189.3	1.849	0.202	178.02	1.685	0.252	166.68	1.2	0.27	167.16	1.079	0.243	171.9	1.26	0.222	174.42	1.433
20	2	4248	32.6	1	18	40	74.1	21.7683	38.7	184.5	95	46.2	38.8	22.8	51	20.5	60.4588	177.384	17.7	89.0625	11.8	60.0446	188.103	551.887	0.9	0.199	176.46	1.983	0.24	166.68	1.7	0.323	158.76	1.155	0.309	157.92	1.161	0.282	159.18	1.361	0.255	162.18	1.541
21	2	4560	26.9	1	8	130	65.3	20.9141	38.1	176.7	87.8	43.4	38.8	22.6	50	20	68.6064	195.026	18.4	93.75	11.9	60.0446	209.212	594.723	0.73	0.181	192.3	1.733	0.196	186.9	1.605	0.262	183.48	0.999	0.253	182.4	1.005	0.217	172.44	1.256	0.212	179.1	1.396
22	2	4205	31.9	2	17	110	68.9	21.6001	39.1	178.6	91.6	44.8	37.1	21.7	51	21.8	69.0856	199.041	18.2	93.0672	11.2	59.2437	206.096	593.778	0.79	0.179	196.74	1.779	0.199	191.7	1.565	0.268	173.94	1.054	0.271	174.42	1.051	0.249	180.18	1.203	0.224	184.62	1.354
23	2	4276	21.3	1	10	80	73.5	21.2452	37.7	186	96.6	48.8	37	22.9	52	21.2	64.898	190.022	18.8	96.0168	12.5	68.7631	202.198	592.037	0.85	0.192	183.48	1.908	0.218	174.42	1.72	0.298	161.7	1.237	0.295	162.6	1.128	0.262	166.2	1.304	0.248	168.54	1.483
24	2	4590	25.2	1	12	100	66.9	21.2339	39.5	177.5	93.2	44.5	37.6	23	52.2	19	67.8625	194.082	16.8	90.5286	9.1	49.1189	221.226	632.693	0.84	0.229	183.48	1.726	0.259	175.98	1.515	0.354	153.48	0.977	0.314	161.28	1.137	0.288	166.2	1.304	0.263	166.68	1.5
25	3	5228	36.7	1	1	40	71.7	24.5204	80.6	171	87.5	43.6	34	21	50.2	18	51.046	148.539	13.8	74.8634	10.7	60.1093	183.34	533.503	0.75	0.219	197.34	1.52	0.269	174.9	1.239	0.322	166.2	1.003	0.305	173.94	1.054	0.273	182.4	1.188	0.249	194.16	1.288
26	3	4917	36.1	1	4	60	77.1	22.5274	70.4	185	98	56.5	37.9	22.2	52.5	18.1	57.9767	171.797	16.8	95.302	10.4	69.5749	216.484	641.489	0.72	0.232	192.3	1.56	0.252	183.48	1.453	0.312	160.86	1.036	0.3	169.98	1.079	0.273	180.72	1.199	0.258	182.94	1.367
27	3	5272	36.1	1	8	35	81.1	23.645	60.2	185.2	97.5	50	39.8	23.5	52	18.5	58.1998	174.653	14.4	84.322	11.1	65.2542	217.395	652.386	0.86	0.229	185.76	1.705	0.271	167.58	1.392	0.305	158.34	1.158	0.304	152.28	1.204	0.273	162.18	1.336	0.252	173.94	1.437
28	3	5130	29.3	1	5	55	64.3	22.782	44.6	168	83.3	40.4	36.5	22	48.4	19	54.2768	153.698	16	88.5387	11.1	65.043	187.247	530.234	0.99	0.188	184.62	1.715	0.209	172.92	1.542	0.263	171.42	1.069	0.253	166.2	1.103	0.232	166.2	1.304	0.217	170.46	1.467
29	3	4800	45.1	1	10	95	73.4	24.9556	60.7	171.5	86	41.8	38.3	24.4	53	19	59.8093	175.062	16.3	87.4715	9.9	49.4305	191.155	559.512	0.82	0.216	191.1	1.657	0.242	182.94	1.458	0.324	163.92	1.017	0.309	167.16	1.097	0.273	170.94	1.268	0.248	178.02	1.404
30	3	5100	27.3	1	2	55	76.7	24.7611	51.4	176	90	44.6	38	23	50.2	19	62.3207	184.43	15.3	89.3305	10.1	51.046	219.637	649.987	0.84	0.197	200.64	1.495	0.224	188.1	1.329	0.3	171.9	0.97	0.28	171.9	1.067	0.252	183.48	1.181	0.226	194.82	1.283
31	3	5134	22.3	1	1.5	25	68.7	22.078	38.6	176.4	89.1	43.3	38.2	22.1	53.2	19	58.2242	167.626	15.5	85.25	10	65.5	209.607	603.455	0.9										0.315	150	1.222	0.283	156.24	1.387	0.256	169.98	1.471
32	3	5151	28.9	2	5.5	37.5	83.6	24.8276	60	183.5	90.4	46.6	35.7	23.7	56.9	19.3	58.2536	176.147	15.3	90.3491	9.3	63.4497	204.821	619.336	0.87	0.219	196.08	1.615	0.241	175.98	1.421	0.312	153.06	0.98	0.277	157.92	1.161	0.258	166.2	1.304	0.242	175.98	1.421
33	3	5284	41.3	2	2	50	71.8	22.9959	64.9	176.7	89.2	43.5	38.8	22.9	49.5	19	54.1783	157.709	15.2	91.0026	10.1	51.671	196.057	570.707	0.89	0.192	186.36	1.699	0.221	174.9	1.429	0.276	162.18	1.028	0.26	167.58	1.094	0.237	173.4	1.25	0.216	177	1.412
34	3	5154	31.8	1	10.5	50	74.8	23.5552	84.4	178.2	91.5	45.6	35.3	21.5	52.5	19	45.7219	134.462	15.4	94.4444	10.2	66.0819	195.43	574.734	0.85	0.249	185.76	1.346	0.249	185.76	1.346				0.302	174.42	1.051	0.272	186.9	1.159	0.246	196.08	1.275
35	3	4934	40.7	1	1.5	80	66.9	23.988	47.2	167	81.2	41	39.4	23.3	52.5	18.2	59.7907	170.998	16	86.25	9.7	53	215.247	615.593	0.82	0.207	188.7	1.59	0.221	177.54	1.502	0.32	155.46	0.965	0.285	163.5	1.121	0.255	177.54	1.22	0.231	175.98	1.421
36	3	5020	35.9	1	6	70	68	21.1518	49.8	179.3	96.1	47.9	36.2	23	51.5	19.1	59.5588	171.03	16.1	88.1481	10.4	58.2716	191.711	625.649	0.82	0.221	204.78	1.546	0.251	196.08	1.36							0.277	185.76	1.166	0.255	192.9	1.296
37	3	5279	35.2	1	2	20	70.6	21.0815	49.6	183	93	44.6	35.8	21	49.5	19	59.915	173.675	15.5	83.2151	9.8	58.156	213.237	618.107	0.85	0.212	173.94	1.821	0.247	162.18	1.541				0.294	158.34	1.158	0.267	161.7	1.34	0.248	163.92	1.525
38	4	5520	22.1	1	2		68.8	21.2346	45.8	180	93	44	37	23.3	51.5	19.1	64.9709	187.118	14.6	84.7875	10.5	63.9821	227.907	656.379	0.95	0.215	172.44	1.836	0.259	168.06	1.388	0.329	157.5	1.058	0.311	157.08	1.167	0.278	161.4	1.343	0.25	163.5	1.529
39	4	5860	25	2	3		86.8	24.2994	79	189	100	50.2	38.7	24.5	53.5	18	56.682	173.012	12.7	77.6423	9.1	61.5854	245.078	718.989	0.9	0.213	170.94	1.755	0.265	158.34	1.263	0.321	156.66	0.957	0.267	151.5	1.21	0.244	155.46	1.394	0.23	160.02	1.562
40	4	5880	32.3	1	1.5	35	67.6	23.0104	75.4	171.4	86	42.5	35.2	22	48	17.2	54.142	155.246	13.9	88.5246	11.6	75.9563	221	633.693	0.86	0.212	196.08	1.445	0.254	174.9	1.239	0.29	168.06	1.091	0.285	158.76	1.15478	0.26	175.98	1.231	0.235	189.3	1.321
41	4	5883	36.1	1	1		63.2	21.7404	84.6	170.5	87.5	45	33	21	45.2	18.3	55.538	156.592	14.7	83.1909	11	69.2308	208.861	588.893	0.86	0.21	223.86	1.446	0.245	169.5	1.377	0.29	169.02	1.085	0.289	164.82	1.112	0.259	167.58	1.293	0.234	169.98	1.471
42	4	5880	31.4	1	3		82.9	25.5297	88	180.2	92.3	43.7	37	21.5	50.3	17	55.8504	168.525	12.3	78.8337	9.3	65.2268	211.005	636.695	0.91	0.224	172.44	1.643	0.288	156.66	1.277	0.358	150	1	0.297	153.06	1.198	0.267	159.18	1.361	0.248	166.2	1.504
43	4	5494	28.1	1	1	35	71.2	25.6833	86.8	166.5	81.3	41.4	37.1	21.7	55.5	18	64.3258	186.855	15.2	91.4847	12	72.4891	242.437	704.237	0.87	0.203	180.18	1.665	0.227	167.58	1.492	0.263	158.76	1.191	0.279	158.34	1.158	0.25	162.6	1.333	0.228	167.16	1.496
44	4	5487	31.6	1	2	45	65.1	21.4282	55.5	174.3	88.6	44.4	36.2	20.6	46.2	18	52.6882	149.661	14.8	88.0466	9.3	54.2274	194.257	551.788	0.99	0.217	194.16	1.545	0.252	186.36	1.252				0.295	178.56	1.027	0.268	181.26	1.195	0.244	188.7	1.325
45	4	6042	34.9	1	1	50	78.3	26.6216	59.2	171.5	88.4	46.2	41	23.3	56.2	16.5	54.6616	162.601	14.3	91.8224	8.8	50.4673	218.739	650.679	0.83	0.251	194.82	1.369	0.275	180.72	1.291				0.367	150.36	1.219	0.278	180.72	1.199	0.263	191.1	1.308
46	4	5649	52.1	1	15	65	60	21.8001	46.1	165.9	88.6	44.8	35.8	21.2	50.9	16.2	63	175.339	14.4	87.8307	9	59.2593	251.818	700.849	0.85	0.223	189.3	1.409	0.243	176.46	1.322	0.337	157.08	0.955	0.28	165.3	1.109	0.253	170.46	1.271	0.232	183.48	1.363
47	4	5722	49.9	1	3	30	81	27.5395	73.2	171.5	85.4	42.2	37	27.1	54.9	17	45.5556	136.667	13.3	80.7588	8.9	61.7886	200.673	602.019	0.87	0.225	207.6	1.365	0.272	187.5	1.156				0.283	190.5	0.962	0.265	194.82	1.112	0.244	201.36	1.242
48	4	5918	35.8	1	7	70	78.1	26.5226	79.5	171.6	86.7	44.1	38.5	24.5	55.6	16.2	48.0154	142.739	12.1	75.7333	8.1	55.7333	201.839	600.023	0.91	0.244	184.62	1.444	0.285	173.4	1.153				0.292	166.2	1.103	0.269	172.44	1.256	0.251	182.4	1.371
